# Supplementary material for: Lactic acid bacteria affect serum cholesterol levels, harmful fecal enzyme activity, and fecal water content
Source: Springer Nature journal article supplement (doi:10.1186/1476-511x-8-21), 2009-06-11

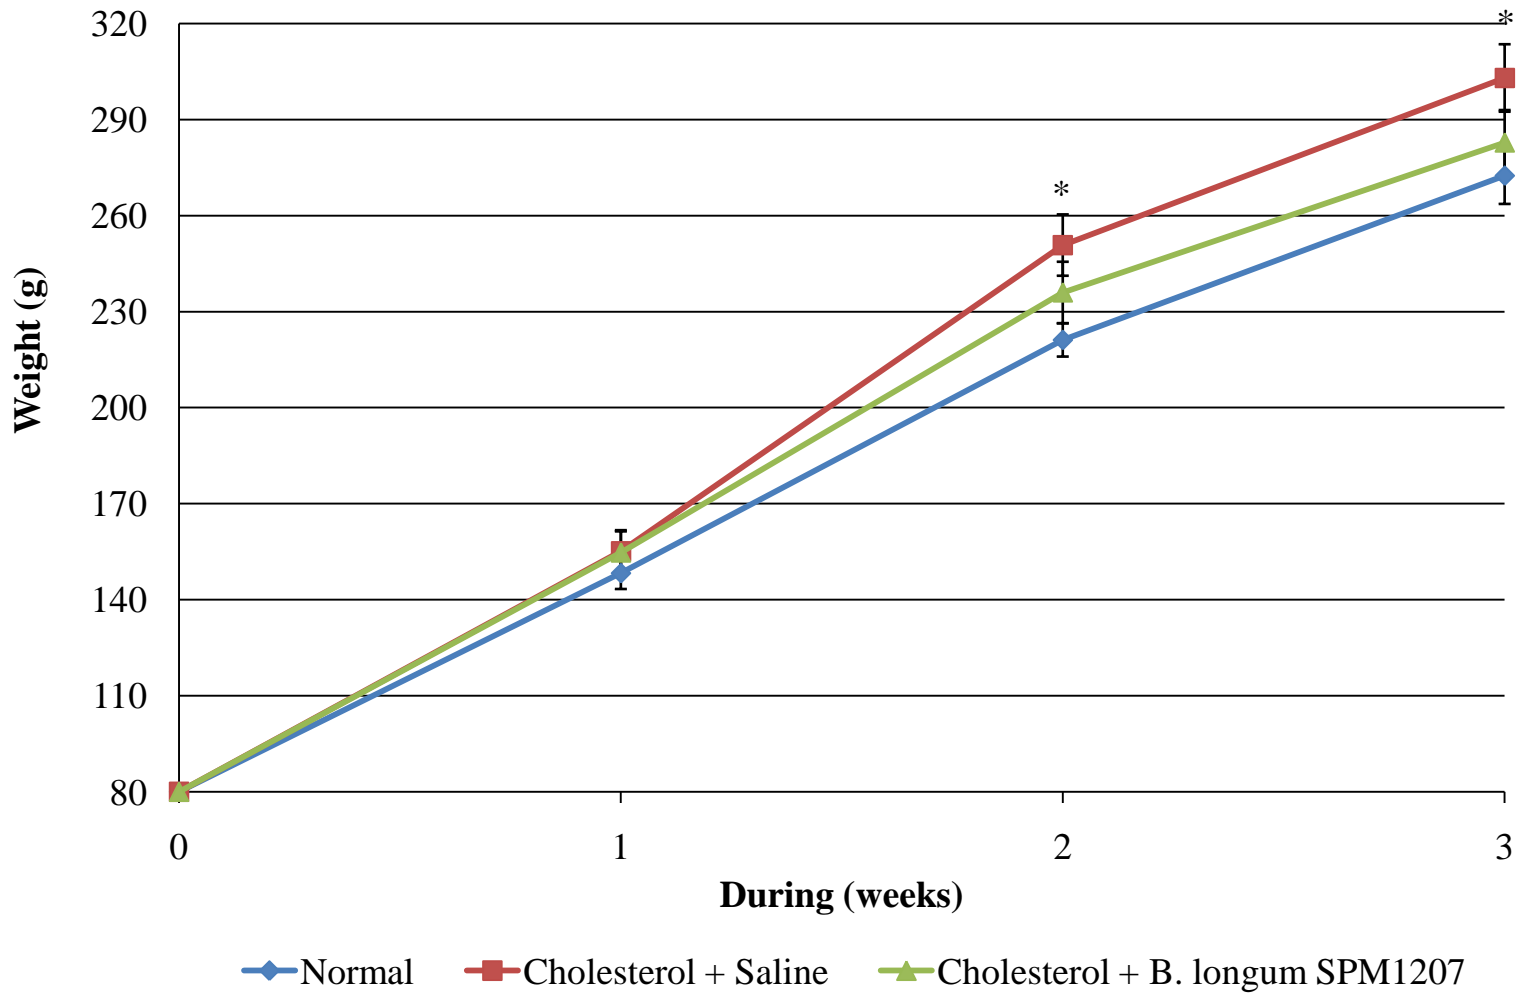

Supplement: 12944_2009_209_MOESM3_ESM.pdf [file 12944_2009_209_MOESM3_ESM.pdf]
